# Supplementary material for: Sandwich-like reduced graphene oxide/yolk–shell-structured Fe@Fe3O4/carbonized paper as an efficient freestanding electrode for electrochemical synthesis of ammonia directly from H2O and nitrogen
Source: Royal Society of Chemistry journal article supplement (doi:10.1039/c9nr02782c), 2019-01-01
Supplement: c9nr02782c1.pdf [file c9nr02782c1.pdf]

## Supplementary Information

**Sandwich-like reduced graphene oxide/yolk-shell-structured Fe@Fe<sub>3</sub>O<sub>4</sub>/carbonized paper as efficient freestanding electrode for electrochemical synthesis of ammonia directly from H<sub>2</sub>O and nitrogen**

**Chun Li, Yongsheng Fu<sup>\*</sup>, Zhen Wu, Jiawei Xia, Xin Wang**

Key Laboratory for Soft Chemistry and Functional Materials of Ministry of Education, Nanjing University of Science and Technology, Nanjing 210094, China

\* Corresponding authors

E-mail addresses: fuyongsheng@njust.edu.cn, fuyongsheng0925@163.com (Y. S. Fu)

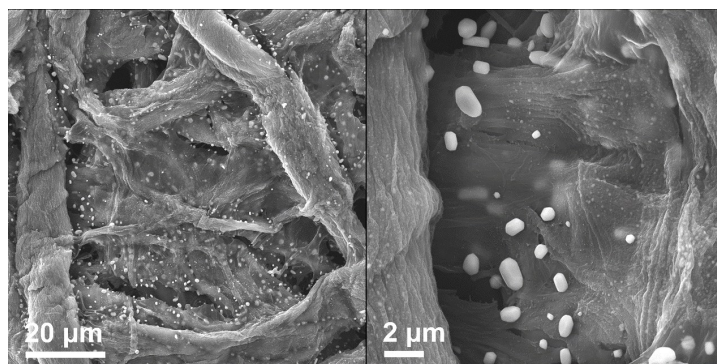

Figure S1. SEM images of Fe-rGO/CP.

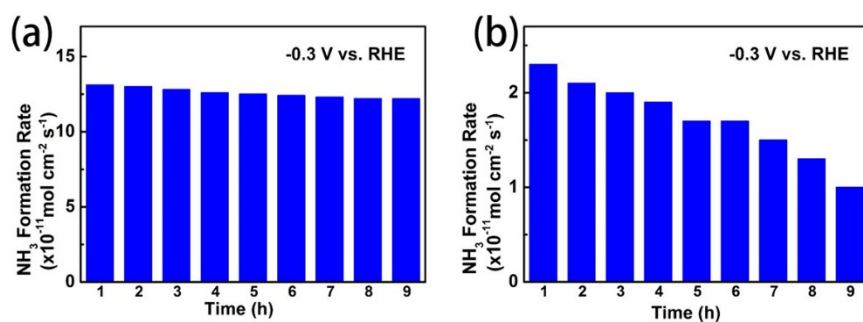

Figure S2. NH<sub>3</sub> formation rates of (a) rGO/Fe@Fe<sub>3</sub>O<sub>4</sub>/CP-1 and (b) Fe/CP in 9 hours.

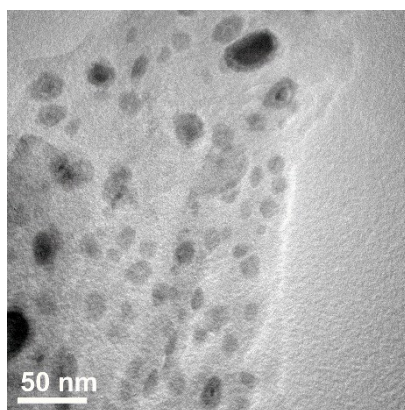

Figure S3. TEM image of rGO/Fe@Fe<sub>3</sub>O<sub>4</sub>/CP-1 after electrolysis.

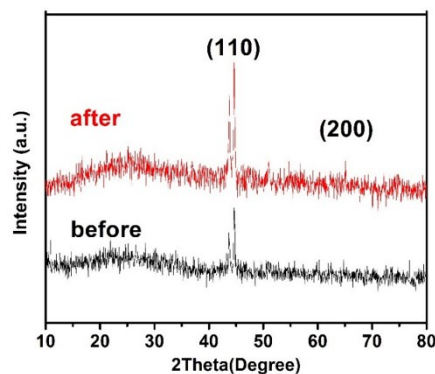

Figure S4. XRD patterns of rGO/Fe@Fe<sub>3</sub>O<sub>4</sub>/CP-1 before and after electrolysis.

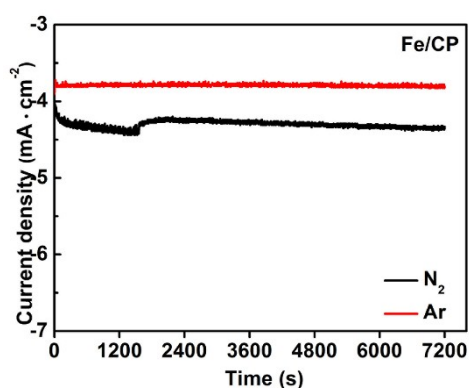

Figure S5. Current densities of Fe/CP in N<sub>2</sub> and Ar saturated electrolyte.

The method used for detection of low concentration ammonia was adapted from the standard methods for the examination of water and wastewater<sup>[1]</sup>.

Apparatus: a spectrophotometer (Shimadzu UV-1800) was used at fixed wavelength ( $\lambda = 420$  nm) with a conventional 1 cm path length cuvette.

Reagents used: Nessler's reagent, Auxiliary reagent: 50 g potassium sodium tartrate tetrahydrate dissolved in 100 ml boiled water and keep this solution in dark place, Standard ammonia solution.

Procedure: 10 mL of electrolyte was taken. Sterile syringe filters were used to filter the electrolyte to remove impurities. Then 200  $\mu$ L of auxiliary reagent, 300  $\mu$ L of Nessler's reagent were added in succession to the sample. After 10 minutes, absorbance measurements were

performed at  $\lambda = 420$  nm. Series standard solutions of  $\text{NH}_4^+$  were measured for calibration curve, which was used to calculate the concentration of ammonia. The measurements were repeated 3 times and the mean values were used as the final data.

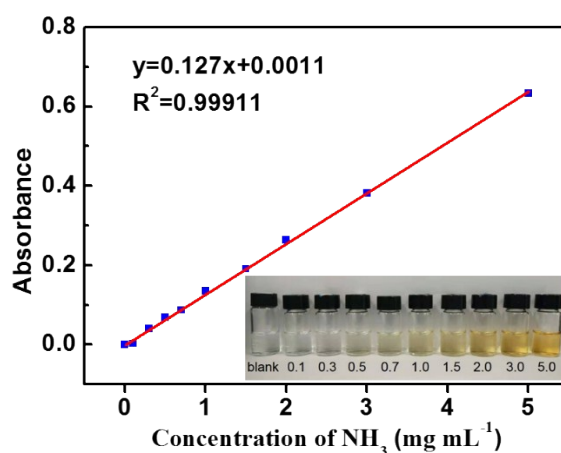

Figure S6. Calibration curve for colorimetric ammonia using Nessler's reagent.

Table S1. Comparison of studied NRR catalysts.

| T/°C | Cathode/catalyst                         | Electrolyte                                      | Reactants                        | Rate, mol s <sup>-1</sup> cm <sup>-2</sup>                                                        | FE, %          | Ref.      |
|------|------------------------------------------|--------------------------------------------------|----------------------------------|---------------------------------------------------------------------------------------------------|----------------|-----------|
| 20   | Ru                                       | 2 M KOH                                          | N <sub>2</sub> /H <sub>2</sub> O | 3.43×10 <sup>-13</sup> (-1.1 V vs Ag/AgCl)                                                        | 0.28           | [2]       |
| 25   | Pt/C                                     | Li <sup>+</sup> /H <sup>+</sup> /NH <sub>4</sub> | N <sub>2</sub> /H <sub>2</sub>   | 1.14×10 <sup>-9</sup> (1.6 V)                                                                     | 0.55           | [3]       |
| 250  | Fe <sub>2</sub> O <sub>3</sub> /AC       | NaOH–KOH                                         | N <sub>2</sub> /H <sub>2</sub> O | 8.27 × 10 <sup>-9</sup> (1.55 V)                                                                  | 4.91           | [4]       |
| 20   | Fe <sub>2</sub> O <sub>3</sub> -CNTs     | Dilute KHCO <sub>3</sub>                         | N <sub>2</sub> /H <sub>2</sub> O | 3.39×10 <sup>-12</sup> (-2.0 V vs Ag/AgCl)                                                        | 0.15 at -1.0 V | [5]       |
| 25   | Mo nanofilm                              | 0.5 M H <sub>2</sub> SO <sub>4</sub>             | N <sub>2</sub> /H <sub>2</sub> O | 3.09×10 <sup>-11</sup> (-0.5V)                                                                    | 0.72           | [6]       |
| 25   | ZIF-derived carbon                       | 0.1M KOH                                         | N <sub>2</sub> /H <sub>2</sub> O | 9.44×10 <sup>-10</sup> (-0.3 V vs. RHE)                                                           | 10.2           | [7]       |
| 25   | THH Au nanorods                          | 1 M KOH                                          | N <sub>2</sub> /H <sub>2</sub> O | 2.69×10 <sup>-11</sup> (-0.2 V vs. RHE)                                                           | ~4.0           | [8]       |
| 25   | Ni wire                                  | 0.1 M LiCl/EDA                                   | N <sub>2</sub> /H <sub>2</sub> O | 2.15×10 <sup>-10</sup> (1.8 V)                                                                    | 17.2           | [9]       |
| 25   | Amorphous Au on<br>CeO <sub>x</sub> /RGO | 0.1 M HCl                                        | N <sub>2</sub> /H <sub>2</sub> O | 1.28×10 <sup>-10</sup> (-0.2 V vs. RHE,<br>mol s <sup>-1</sup> mg <sub>cat.</sub> <sup>-1</sup> ) | 10.1           | [10]      |
| 25   | Au-TiO <sub>2</sub> /Pt plate            | 0.1 M HCl                                        | N <sub>2</sub> /H <sub>2</sub> O | 3.72×10 <sup>-10</sup> (-0.2 V vs. RHE,<br>mol s <sup>-1</sup> mg <sub>cat.</sub> <sup>-1</sup> ) | 8.11           | [11]      |
| 25   | N doped carbon                           | 0.05 M H <sub>2</sub> SO <sub>4</sub>            | N <sub>2</sub> /H <sub>2</sub> O | 1.7 × 10 <sup>-10</sup> (-0.9 V vs. RHE)                                                          | 1.5            | [12]      |
| 25   | Iron-loaded carbon                       | 0.2 M NaHCO <sub>3</sub>                         | N <sub>2</sub> /H <sub>2</sub> O | 1.3 × 10 <sup>-10</sup> (0.3 V vs. RHE)                                                           | 6.25           | This work |

## References

- [1] Standard Methods for the Examination of Water and Wasterwater, 23rd Edition, American Public Health Association, American Water Works Association, Water Environment Federation, Washington, DC, USA, **2017**.
- [2] V. Kordali, G. Kyriacou, Ch. Lambrou, *Chem. Commun* 2000, **17**, 1673.
- [3] R. Lan, J.T. Irvine, S. Tao, *Sci Rep*, 2013, **3**, 1145.
- [4] B. Cui, J. Zhang, S. Liu, X. Liu, W. Xiang, L. Liu, H. Xin, M.J. Lefler, S. Licht, *Green Chem.*, 2017, **19**, 298.
- [5] S. Chen, S. Perathoner, C. Ampelli, C. Mebrahtu, D. Su, G. Centi, *Angew Chem Int Ed Engl*, 2017, **56**, 2699.
- [6] D. Yang, T. Chen, Z. Wang, *J. Mater. Chem. A*, 2017, **5**, 18967.
- [7] S. Mukherjee, D.A. Cullen, S. Karakalos, K. Liu, H. Zhang, S. Zhao, H. Xu, K.L. More, G. Wang, G. Wu, *Nano Energy*, 2018, **48**, 217.
- [8] D. Bao, Q. Zhang, F.L. Meng, H.X. Zhong, M.M. Shi, Y. Zhang, J.M. Yan, Q. Jiang, X.B. Zhang, *Adv Mater*, 2017, **29**, 1604799.
- [9] K. Kim, C.Y. Yoo, J.N. Kim, H.C. Yoon, J.I. Han, *Journal of The Electrochemical Society*, 2016, **163**, 1523.
- [10] S.J. Li, D. Bao, M.M. Shi, B.R. Wulan, J.M. Yan, Q. Jiang, *Adv Mater*, 2017, **29**, 1700001.
- [11] M.M. Shi, D. Bao, B.R. Wulan, Y.H. Li, Y.F. Zhang, J.M. Yan, Q. Jiang, *Adv Mater*, 2017, **29**, 1606550.
- [12] Y. Liu, Y. Su, X. Quan, X. Fan, S. Chen, H. Yu, H. Zhao, Y. Zhang, J. Zhao, *ACS Catalysis*, 2018, **8**, 1186.
